# Supplementary material for: Effect of Alkaline Conditions on Forming an Effective G4.0 PAMAM Complex with Doxorubicin
Source: MDPI journal article supplement (doi:10.3390/pharmaceutics15030875), 2023-03-08
Supplement: s1 [file s1]

## Supplementary material

### Effect of alkaline conditions on forming an effective G4.0 PAMAM complex with doxorubicin.

Magdalena Szota<sup>1</sup>, Barbara Jachimska<sup>1\*</sup>

<sup>1</sup>Jerzy Haber Institute of Catalysis and Surface Chemistry Polish Academy of Sciences, Krakow, Poland

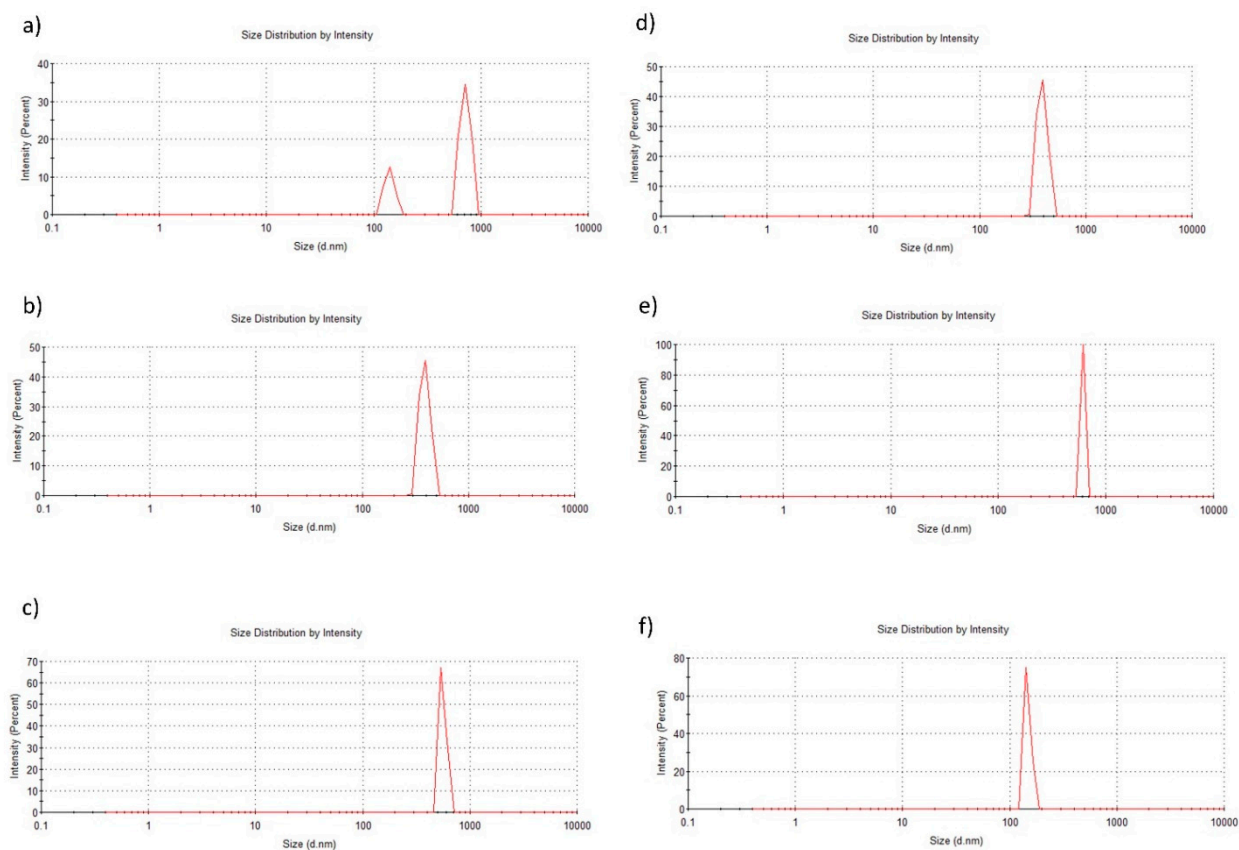

Figure S1. Particle size distribution of G4.0 PAMAM-DOX complexes by intensity as a function of pH of formation for molar ratio 1:6: a) 9.0; b) 9.5; c) 10.0 and the initial molar ratio of components: d) 1:6; e) 1:12; f) 1:24 at pH 9.5.
